# Supplementary material
Source: HighWire-hosted journal article supplement (http://dmd.aspetjournals.org/highwire/filestream/66451/field_highwire_adjunct_files/0/Supplementary_Data_57935.pdf)
Supplement: Supplementary_Data_57935.pdf [file Supplementary_Data_57935.pdf]

DMD # 57935

Article's Title:

A Useful Model Capable of Predicting the Clearance of CYP3A4 Substrates in Humans: Validity of CYP3A4 Transgenic Mice Lacking Their Own Cyp3a Enzymes

Authors:

Tetsuya Mitsui, Takayuki Nemoto, Taiji Miyake, Shunsuke Nagao, Kotaro Ogawa, Motohiro Kato, Masaki Ishigai, and Hideyuki Yamada

Journal Title:

Drug Metabolism and Disposition

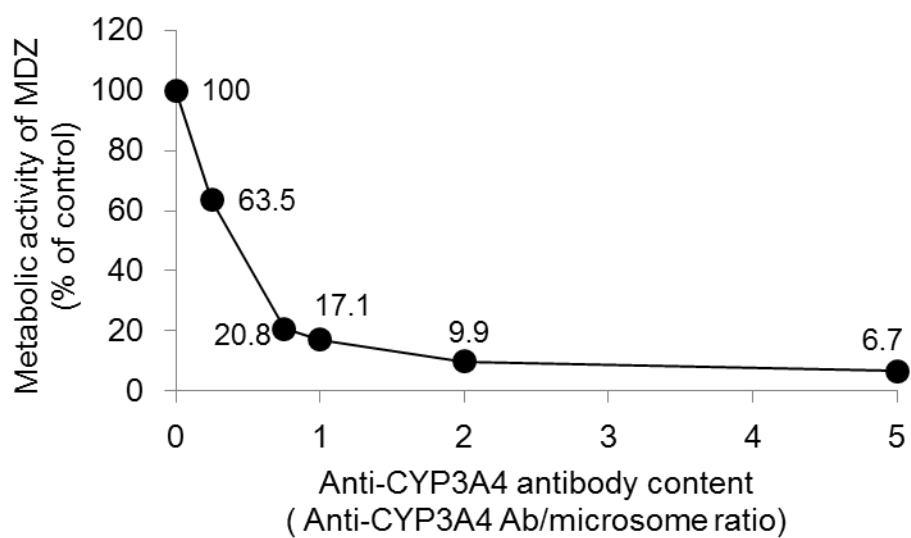

**Supplemental Fig.1.** Immunoinhibition effect of anti-CYP3A4 antibody on metabolic activity of midazolam by liver microsomes of human

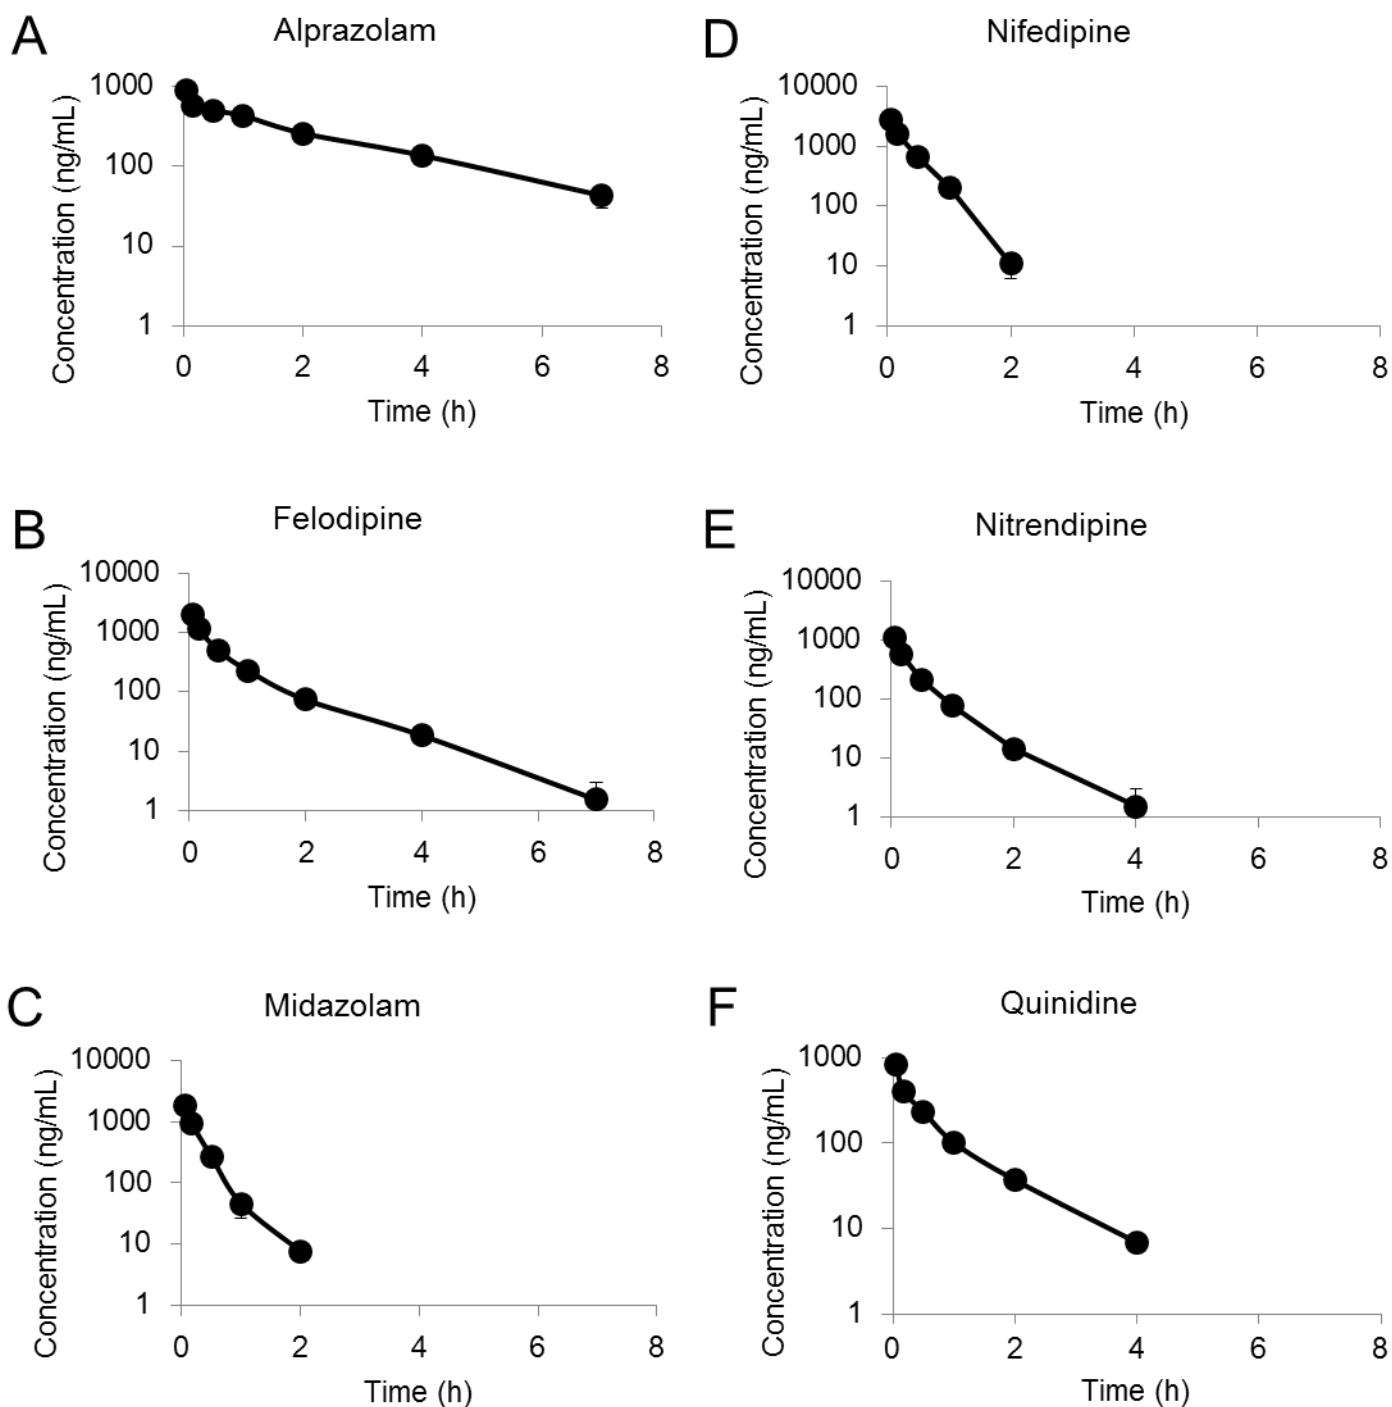

**Supplemental Fig.2.** Plasma concentrations of CYP3A4 substrates of Alprazolam(A), Felodipine(B), Midazolam(C), Nifedipine(D), Nitrendipine(E) and Quinidine (F) following an intravenous administration to CYP3A4 Tg-mice. Each point represents the mean  $\pm$  s.d. (n=3)

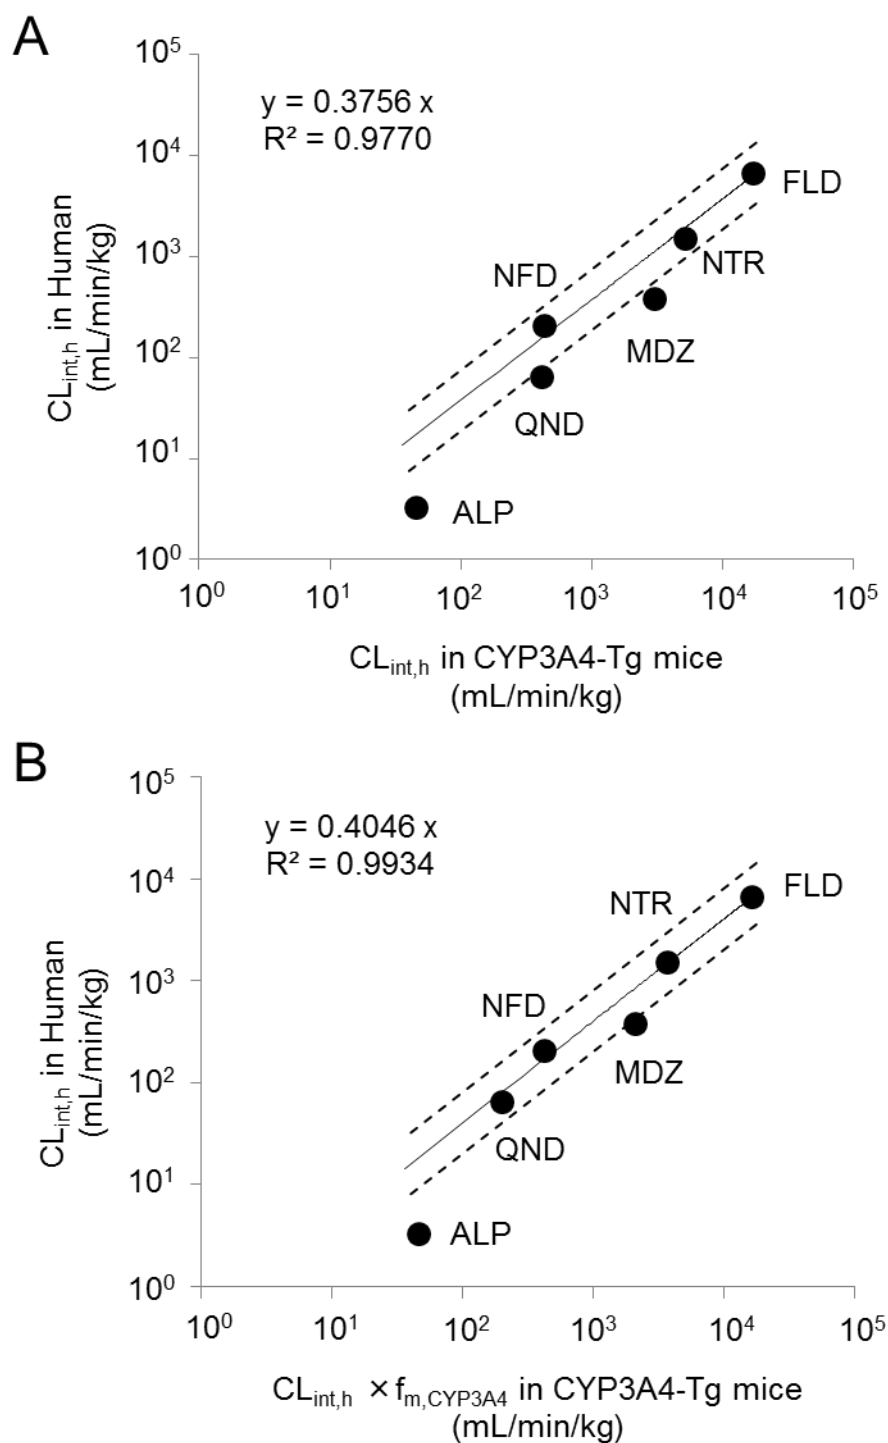

**Supplemental Fig.3.** Correlation estimated by linear regression analysis for the CL<sub>int,h</sub> of CYP3A4 substrates between CYP3A4-Tg mice and humans. The CL<sub>int,h</sub> in CYP3A4-Tg mice was calculated without (A) and with (B) multiplying by f<sub>m,CYP3A4</sub>. The solid line represents a regression line empirically fitted to the data for all substrates, and dotted lines represent the levels of the 2-fold or 1/2-fold of the regression value.

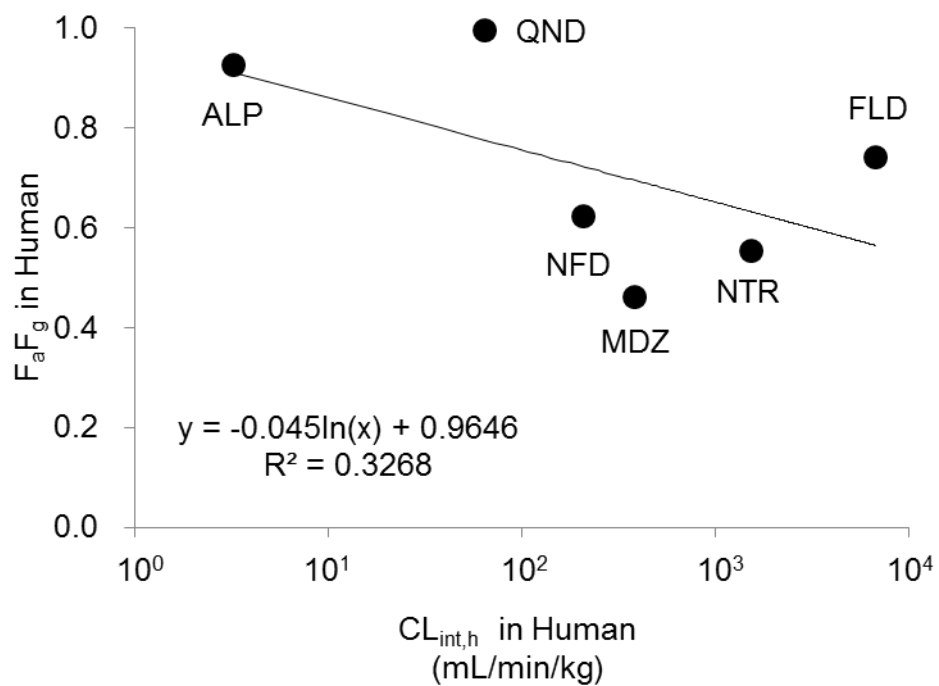

**Supplemental Fig.4.** Correlation for the  $CL_{int,h}$  and  $F_aF_g$  of CYP3A4 substrates in humans. The solid line represents a regression line empirically fitted to the data for all substrates.

Supplemental TABLE 1-1

The gradient conditions of HPLC eluent for measurement of drug conditions  
excepting for the plasma unbound fraction analysis

| Time<br>(min) | Mobile phase B % (v/v) |     |     |     |     |     |
|---------------|------------------------|-----|-----|-----|-----|-----|
|               | ALP                    | FLD | MDZ | NFD | NTL | QND |
| 0.0           | 15                     | 15  | 5   | 15  | 15  | 5   |
| 3.0           | —                      | —   | 25  | —   | —   | 25  |
| 5.0           | 90                     | 90  | 90  | 90  | 90  | 90  |
| 8.5           | 90                     | 90  | 90  | 90  | 90  | 90  |
| 8.5           | 15                     | 15  | 5   | 15  | 15  | 5   |
| 11.5          | 15                     | 15  | 5   | 15  | 15  | 5   |

Supplemental TABLE 1-2

The gradient conditions of HPLC eluent for measurement of drug conditions  
for the plasma unbound fraction analysis

| Time<br>(min) | Mobile phase B % (v/v) |     |     |     |     |     |
|---------------|------------------------|-----|-----|-----|-----|-----|
|               | ALP                    | FLD | MDZ | NFD | NTL | QND |
| 0.0           | 5                      | 5   | 5   | 5   | 5   | 5   |
| 5.0           | 90                     | 90  | 90  | 90  | 90  | 90  |
| 8.0           | 90                     | —   | 90  | —   | —   | 90  |
| 8.0           | 5                      | —   | 5   | —   | —   | 5   |
| 9.0           | —                      | 90  | —   | 90  | 90  | —   |
| 9.0           | —                      | 5   | —   | 5   | 5   | —   |
| 11.0          | 5                      | —   | 5   | —   | —   | 5   |
| 12.0          | —                      | 5   | —   | 5   | 5   | —   |

Supplemental TABLE 2-1

Mass number of the monitor ions for each compound for measurement of drug concentrations excepting for the plasma unbound fraction analysis

| Target ion /<br>analytical mode | Drug     |          |          |          |          |          |
|---------------------------------|----------|----------|----------|----------|----------|----------|
|                                 | ALP      | FLD      | MDZ      | NFD      | NTL      | QND      |
| precursor (m/z)                 | 309.2    | 384.1    | 325.9    | 345.1    | 361.1    | 325.0    |
| product (m/z)                   | 281.1    | 351.9    | 291.1    | 122.0    | 329.2    | 184.4    |
| Polarity                        | Positive | Positive | Positive | Negative | Positive | Positive |

Supplemental TABLE 2-2

Mass number of the monitor ions for each compound for measurement of drug concentrations for the plasma unbound fraction analysis

| Target ion /<br>analytical mode | Drug     |          |          |          |          |          |
|---------------------------------|----------|----------|----------|----------|----------|----------|
|                                 | ALP      | FLD      | MDZ      | NFD      | NTL      | QND      |
| precursor (m/z)                 | 309.2    | 382.2    | 326.3    | 345.2    | 359.2    | 325.5    |
| product (m/z)                   | 281.1    | 144.9    | 291.3    | 121.8    | 122.0    | 172.2    |
| Polarity                        | Positive | Negative | Positive | Negative | Negative | Positive |

## Supplemental TABLE 3

Accuracy of the predicted human  $CL_h$  of six CYP3A4 substrates based on the correlation of  $CL_{int,h}$  between human and WT mice compared with observed values

| Substrate    | $CL_h$ (mL/min/kg) |           | Accuracy |
|--------------|--------------------|-----------|----------|
|              | Observed           | Predicted | (%)      |
| Alprazolam   | 1.03               | 4.65      | 452      |
| Felodipine   | 16.4               | 16.3      | 99       |
| Midazolam    | 7.26               | NC        | NC       |
| Nifedipine   | 5.82               | 1.06      | 18       |
| Nitrendipine | 12.3               | 14.2      | 116      |
| Quinidine    | 4.14               | 4.03      | 97       |



Supplemental TABLE 4  
Pharmacokinetic parameters in human  
after oral administration

| Substrate    | F <sup>a</sup> | F <sub>a</sub> ×F <sub>g</sub> <sup>b</sup> |
|--------------|----------------|---------------------------------------------|
| Alprazolam   | 0.88           | 0.93                                        |
| Felodipine   | 0.16           | 0.74                                        |
| Midazolam    | 0.30           | 0.46                                        |
| Nifedipine   | 0.45           | 0.62                                        |
| Nitrendipine | 0.23           | 0.55                                        |
| Quinidine    | 0.80           | 0.99                                        |

<sup>a</sup>Each value was quoted from the references

<sup>b</sup>Each value was calculated by using the  
following equation  $F = F_a \times F_g \times F_h$
